# Supplementary material
Source: MDPI journal article supplement (https://www.mdpi.com/2073-445X/7/4/130)
Supplement: s1 [file s1]

# Institutional Functionality in Participatory Integrated Watershed Development of Tana Sub-basin, Ethiopia

Gebremedn Tesfaye, Tena Alamirew, Asfaw Kebede, and Gete Zeleke

This supplementary material supports the main text as follows:

**Table S1.** Presence of institutional characteristics between the two groups of watershed.

| Clarity of Purpose/Objectives |                                                                                                                   | With support of WLRC |          |           | Without support of WLRC |          |           |
|-------------------------------|-------------------------------------------------------------------------------------------------------------------|----------------------|----------|-----------|-------------------------|----------|-----------|
|                               |                                                                                                                   | Agree                | Not sure | Dis agree | Agree                   | Not sure | Dis agree |
| 1                             | Organization have clear set of objectives                                                                         | 33                   | 28       | 26        | 28                      | 33       | 29        |
| 2                             | The WSD institution's objectives and purpose were clear to everyone                                               | 31                   | 23       | 33        | 18                      | 26       | 46        |
| 3                             | Deviation from NRM objectives were not frequent                                                                   | 22                   | 47       | 18        | 21                      | 39       | 30        |
| <b>Good Interaction</b>       |                                                                                                                   |                      |          |           |                         |          |           |
| 1                             | There is good watershed committee to facilitate and guide the interactions                                        | 43                   | 16       | 28        | 19                      | 45       | 26        |
| 2                             | There is good interaction between different institution                                                           | 13                   | 54       | 20        | 9                       | 55       | 26        |
| 3                             | There is good interaction between the watershed institution and higher level institutions such as the government. | 49                   | 27       | 11        | 41                      | 26       | 23        |
| 4                             | There is coordination mechanism between the watershed committee and the villagers.                                | 41                   | 24       | 22        | 24                      | 41       | 25        |
| 5                             | There is regular meeting                                                                                          | 39                   | 25       | 23        | 23                      | 34       | 33        |
| <b>Adaptiveness</b>           |                                                                                                                   |                      |          |           |                         |          |           |
| 1                             | The rules and procedures of the watershed institution is flexible or not very rigid                               | 32                   | 29       | 26        | 27                      | 31       | 24        |
| 2                             | There is clear set mechanism for changing the rule of the institution                                             | 19                   | 37       | 31        | 11                      | 35       | 44        |
| 3                             | There is a regular review of the rules and systems of the institution                                             | 28                   | 37       | 22        | 17                      | 41       | 32        |
| <b>Scale/Size</b>             |                                                                                                                   |                      |          |           |                         |          |           |
| 1                             | The size of the watershed is appropriate for efficient management                                                 | 44                   | 38       | 5         | 39                      | 36       | 15        |
| 2                             | The higher level/ bigger issues/ were properly addressed by higher level authorities/ institutions/ government    | 45                   | 30       | 12        | 41                      | 19       | 30        |
| 3                             | The lower level/ smaller issues/were properly addressed by lower level groups (e.g. WSC, DAs, individuals)        | 55                   | 17       | 15        | 51                      | 16       | 23        |
| <b>Compliance</b>             |                                                                                                                   |                      |          |           |                         |          |           |
| 1                             | There is strong bylaws and enforcement to protect land resource degradation                                       | 47                   | 18       | 22        | 26                      | 29       | 35        |
| 2                             | Members are aware to follow the rule                                                                              | 37                   | 28       | 22        | 24                      | 34       | 32        |
| 3                             | Watershed institution follow its rule to set the compliance                                                       | 31                   | 29       | 27        | 10                      | 44       | 36        |
| 4                             | The compliance to the rule is sufficient                                                                          | 39                   | 30       | 18        | 24                      | 42       | 24        |
